# Supplementary material for: Modelling winter organic aerosol at the European scale with CAMx: evaluation and source apportionment with a VBS parameterization based on novel wood burning smog chamber experimentsog
Source: Copernicus journal article supplement (doi:10.5194/acp-2016-785), 2016-10-21
Supplement: Supplementary file 1 [file acp-2016-785-supplement.pdf]

## 1 Supplement

Table S1. Statistics for model evaluation.  $M_i$  represents the modelled value,  $O_i$  the observations,  $\bar{O}$  the mean of the observations and  $n$  the total number of data points.

|                                        |                                                                                |
|----------------------------------------|--------------------------------------------------------------------------------|
| Mean Bias (MB)                         | $MB = \frac{1}{n} \sum_{i=1}^n (M_i - O_i),$                                   |
| Mean Error (ME)                        | $ME = \frac{1}{n} \sum_{i=1}^n ( M_i - O_i ),$                                 |
| Mean Fractional Bias (ME)              | $MFB = \frac{2}{n} \sum_{i=1}^n \left( \frac{M_i - O_i}{M_i + O_i} \right),$   |
| Mean Fractional Bias (ME)              | $MFE = \frac{2}{n} \sum_{i=1}^n \left( \frac{ M_i - O_i }{M_i + O_i} \right),$ |
| Coefficient of determination ( $R^2$ ) | $R^2 = 1 - \frac{\sum_{i=1}^n (O_i - M_i)^2}{\sum_{i=1}^n (O_i - \bar{O})^2}.$ |

Table S2. Statistical analysis for HOA during February-March 2009 periods at 11 AMS sites.

| Site        | Mean<br>observed<br>HOA<br>( $\mu\text{g m}^{-3}$ ) | Mean<br>modelled<br>HOA<br>( $\mu\text{g m}^{-3}$ ) | MB<br>( $\mu\text{g m}^{-3}$ ) | ME<br>( $\mu\text{g m}^{-3}$ ) | MFB<br>[-] | MFE<br>[-] | r   | R <sup>2</sup> |
|-------------|-----------------------------------------------------|-----------------------------------------------------|--------------------------------|--------------------------------|------------|------------|-----|----------------|
| Barcelona   | 2.1                                                 | 0.8                                                 | -1.3                           | 1.5                            | -0.4       | 0.8        | 0.4 | 0.1            |
| Cabauw      | 0.3                                                 | 0.4                                                 | 0.2                            | 0.2                            | 0.6        | 0.8        | 0.5 | 0.2            |
| Chilbolton  | 0.5                                                 | 0.3                                                 | -0.2                           | 0.3                            | -0.5       | 0.7        | 0.8 | 0.6            |
| Helsinki    | 0.4                                                 | 1.0                                                 | 0.6                            | 0.7                            | 0.8        | 0.9        | 0.2 | 0.1            |
| Hyytiälä    | 0.0                                                 | 0.1                                                 | 0.1                            | 0.1                            | 0.7        | 0.8        | 0.6 | 0.3            |
| Mace Head   | 0.1                                                 | 0.1                                                 | -0.1                           | 0.1                            | 0.5        | 1.1        | 0.6 | 0.3            |
| Melpitz     | 0.1                                                 | 0.1                                                 | 0.0                            | 0.1                            | -0.1       | 0.6        | 0.6 | 0.3            |
| Montseny    | 0.2                                                 | 0.1                                                 | -0.1                           | 0.2                            | -0.3       | 0.8        | 0.4 | 0.1            |
| Payerne     | 0.3                                                 | 0.3                                                 | -0.1                           | 0.2                            | 0.0        | 0.6        | 0.4 | 0.1            |
| Puy de Dôme | 0.0                                                 | 0.1                                                 | 0.0                            | 0.0                            | 0.3        | 0.8        | 0.1 | 0.0            |
| Vavihill    | 0.4                                                 | 0.2                                                 | -0.2                           | 0.2                            | -0.4       | 0.7        | 0.5 | 0.2            |

Table S3 Statistical analysis for BBOA during February-March 2009 periods at 11 AMS sites.

| Site        | Mean<br>observed<br>BBOA<br>( $\mu\text{g m}^{-3}$ ) | Mean<br>modelled<br>BBOA<br>( $\mu\text{g m}^{-3}$ ) | MB<br>( $\mu\text{g m}^{-3}$ ) | ME<br>( $\mu\text{g m}^{-3}$ ) | MFB<br>[-] | MFE<br>[-] | r    | R <sup>2</sup> |
|-------------|------------------------------------------------------|------------------------------------------------------|--------------------------------|--------------------------------|------------|------------|------|----------------|
| Barcelona   | 0.7                                                  | 1.1                                                  | 0.5                            | 0.7                            | 0.6        | 0.8        | 0.4  | 0.2            |
| Cabauw      | 0.1                                                  | 0.5                                                  | 0.3                            | 0.3                            | 1.0        | 1.1        | 0.5  | 0.3            |
| Chilbolton  | 0.5                                                  | 0.2                                                  | -0.3                           | 0.3                            | -0.6       | 0.8        | 0.6  | 0.4            |
| Helsinki    | 0.4                                                  | 1.4                                                  | 1.0                            | 1.1                            | 1.1        | 1.1        | 0.1  | 0.0            |
| Hyytiälä    | 0.1                                                  | 0.5                                                  | 0.4                            | 0.4                            | 1.5        | 1.5        | 0.7  | 0.5            |
| Mace Head   | 0.3                                                  | 0.0                                                  | -0.3                           | 0.3                            | -0.9       | 1.4        | -0.1 | 0.0            |
| Melpitz     | 0.2                                                  | 0.3                                                  | 0.1                            | 0.2                            | 0.7        | 0.9        | 0.4  | 0.2            |
| Montseny    | 0.2                                                  | 0.3                                                  | 0.1                            | 0.2                            | 0.5        | 0.8        | 0.2  | 0.1            |
| Payerne     | 0.4                                                  | 0.8                                                  | 0.4                            | 0.5                            | 0.8        | 0.9        | 0.6  | 0.3            |
| Puy de Dôme | 0.1                                                  | 0.2                                                  | 0.1                            | 0.2                            | 0.5        | 1.0        | 0.3  | 0.1            |
| Vavihill    | 0.7                                                  | 0.7                                                  | 0.1                            | 0.5                            | -0.1       | 0.7        | 0.5  | 0.2            |

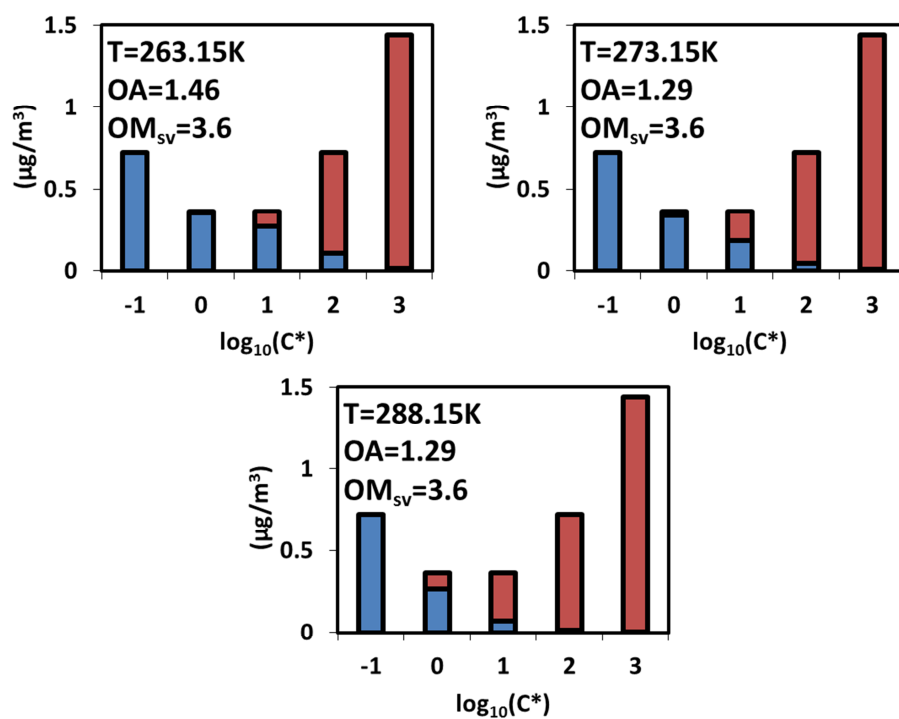

Figure S1. Box-model partitioning of biomass burning POA at about  $1 \mu\text{g m}^{-3}$  OA at different temperatures (263.15, 273.15 and 288.15 K) using volatility distributions proposed by May et al. (2013). Particle phase is represented blue and gas phase in red.

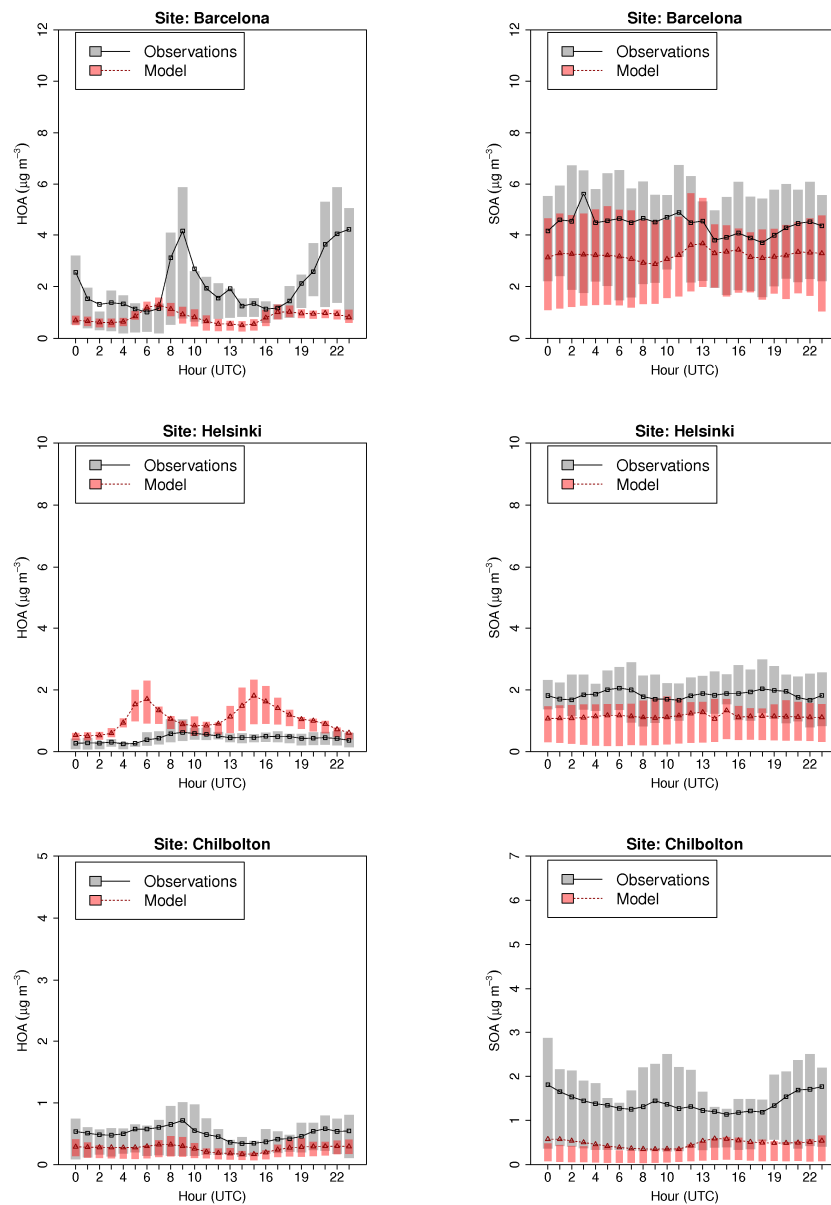

Figure S2 Comparison of modelled (red) and measured (grey) HOA and SOA diurnal profiles at the sites of Barcelona, Helsinki and Chilbolton. The extent of the bars indicates the 25th and 75th percentiles.
